# Supplementary material
Source: Springer Nature journal article supplement (https://www.springermedizin.de/resource/supplementary/12891_2010_892_MOESM2_ESM.pdf/9506646)
Supplement: MOESM2 [file 9506646]

## PULL-UP TEST

**Purpose:** To measure dynamic endurance of flexor muscles in arm and shoulder.

**Method:** The conscript is required to raise his chin over a bar and then return to the starting point with elbows fully extended.

**Outcome:** Repeats without time limit. Repeats have to be consecutive and intermission in the starting point is not allowed. Result categories: Excellent ( $\geq 14$ ), Good ( $\geq 10$ ), Fair good ( $\geq 6$ ) and Poor ( $< 6$ ) [repeats].

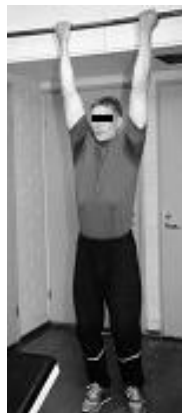

Starting position

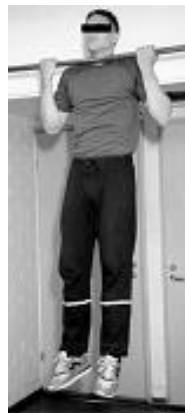

Top position
